# Supplementary material for: Study design and baseline characteristics for the reflect gene therapy trial ofm.11778g>A/ND4-LHON
Source: HighWire-hosted journal article supplement (doi:10.1136/bmjophth-2022-001158), 2022-11-01
Supplement: bmjophth-2022-001158supp001_data_supplement.pdf [file bmjophth-2022-001158supp001_data_supplement.pdf]

**Supplemental Table 1: Main Inclusion and Exclusion Criteria**

|                                                                                                                                                                                                                                                                                                                                                                                                                                                                                                                                                                                                                                                                                                                                                                                                                                                                                                                                                                                                                                                                                                                                                          |
|----------------------------------------------------------------------------------------------------------------------------------------------------------------------------------------------------------------------------------------------------------------------------------------------------------------------------------------------------------------------------------------------------------------------------------------------------------------------------------------------------------------------------------------------------------------------------------------------------------------------------------------------------------------------------------------------------------------------------------------------------------------------------------------------------------------------------------------------------------------------------------------------------------------------------------------------------------------------------------------------------------------------------------------------------------------------------------------------------------------------------------------------------------|
| <p><b>Inclusion criteria</b></p> <ul style="list-style-type: none"><li>• Age 15 years or older</li><li>• Clinically manifested vision loss in at least one eye, due to <i>MT-ND4</i> LHON</li><li>• Documented results of genotyping showing the presence of the m.11778G&gt;A mutation in the <i>ND4</i> gene and absence of other primary LHON-associated mutations (m.3460G&gt;A or m.14484T&gt;C)</li><li>• Duration of vision loss <math>\leq</math>1 year in each affected eye</li><li>• At least Hand Motion visual acuity in each eye</li><li>• Negative test for human immunodeficiency virus infection</li><li>• Negative pregnancy test for women of childbearing potential</li><li>• Female subjects (if of childbearing potential) had to agree to use effective methods of birth control and male subjects had to agree to use condoms, for up to 6 months after treatment administration</li><li>• Discontinuation of idebenone treatment at least 7 days before inclusion. Concomitant treatment with idebenone was not authorized during the study</li></ul>                                                                            |
| <p><b>Exclusion criteria</b></p> <ul style="list-style-type: none"><li>• Any known allergy or hypersensitivity to lenadogene nolparovec</li><li>• Contraindication to IVT in any eye</li><li>• Previous treatment with an investigational medicinal drug (except idebenone if discontinued at least 7 days before inclusion)</li><li>• Ocular surgery of clinical relevance (per investigator assessment) within 90 days preceding the screening</li><li>• IVT performed in any eye within 30 days prior screening</li><li>• Disorders of the eye or adnexa other than LHON which may interfere with ophthalmologic assessments (including SD-OCT) during the study</li><li>• Mutations other than m.11778G&gt;A in the <i>ND4</i> gene known to cause pathology of the optic nerve, retina or afferent visual system</li><li>• Systemic or ophthalmologic disorders other than LHON known to be associated with visual dysfunction or for which associated treatment(s) may cause visual dysfunction</li><li>• History of recurrent uveitis or active ocular inflammation</li><li>• Presence of alcoholism or drug abuse (excluding nicotine)</li></ul> |

IVT, intravitreal; LHON, Leber Hereditary Optic Neuropathy; SD-OCT, Spectral-Domain Optical Coherence Tomography

**Supplemental Table 2: Baseline Characteristics of REFLECT Patients**

|                                                    | N=98 subjects (196 eyes) |           |
|----------------------------------------------------|--------------------------|-----------|
|                                                    | Mean (SD) or n (%)       | Range     |
| <b>DEMOGRAPHIC CHARACTERISTICS</b>                 |                          |           |
| Gender, Male, n                                    | 78 (79.6%)               |           |
| Age at onset of the disease (years)                | 31.5 (13.8)              | 14; 73    |
| Age group at onset of the disease, n               |                          |           |
| <15 years                                          | 4 (4.1%)                 |           |
| 15-18 years                                        | 9 (9.2%)                 |           |
| 18-60 years                                        | 80 (81.6%)               |           |
| ≥60 years                                          | 5 (5.1%)                 |           |
| Age at screening (years)                           | 32.1 (13.8)              | 15; 74    |
| Age group at screening, n                          |                          |           |
| 15 – 18 years                                      | 10 (10.2%)               |           |
| 18 – 60 years                                      | 83 (84.7%)               |           |
| ≥60 years                                          | 5 (5.1%)                 |           |
| Study region (location of study sites), n          |                          |           |
| Asia                                               | 15 (15.3%)               |           |
| Europe                                             | 27 (27.6%)               |           |
| United States                                      | 56 (57.1%)               |           |
| Current tobacco smoking, n                         | 21 (21.4%)               |           |
| Current alcohol consumption, n                     | 48 (49.0%)               |           |
| Blood Pressure                                     |                          |           |
| Systolic Blood pressure (mm Hg)                    | 127.7 (14.61)            | 92, 166   |
| Diastolic Blood Pressure (mm Hg)                   | 80.1 (10.83)             | 54, 110   |
| Medical history, n <sup>1</sup>                    |                          |           |
| Anxiety                                            | 15 (15.3%)               |           |
| Hypertension                                       | 14 (14.3%)               |           |
| Cataract                                           | 13 (13.3%)               |           |
| <b>DISEASE CHARACTERISTICS</b>                     |                          |           |
| Duration of vision loss at baseline (months)       | 8.30 (3.2)               | 1.7; 11.9 |
| Inter-eye delay of vision loss (months)            | 1.95 (1.98)              | 0; 8.7    |
| Simultaneous vision loss of both eyes              | 24 (24.49%)              |           |
| Bilateral vision loss at baseline <sup>2</sup> , n | 97 (99.0%)               |           |
| Prior idebenone treatment <sup>3</sup> , n         | 14 (14.3%)               |           |
| <b>Best Corrected Visual acuity (BCVA)</b>         |                          |           |

|                                                              |               |             |
|--------------------------------------------------------------|---------------|-------------|
| BCVA of all eyes                                             | 1.55 (0.47)   | 0; 2.30     |
| BCVA of first-affected eye (LogMAR)                          | 1.64 (0.45)   | 0.60; 2.30  |
| BCVA of second/not-yet-affected eye (LogMAR)                 | 1.47 (0.48)   | 0.00; 2.30  |
| Better seeing-eye, n                                         |               |             |
| First affected eye                                           | 27 (27.6%)    |             |
| Second/not-yet-affected eye                                  | 71 (72.4%)    |             |
| Eyes off-chart at baseline (BCVA >1.6 LogMAR)                |               |             |
| First-affected eye                                           | 40 (40.8%)    |             |
| Second/not-yet-affected eye                                  | 28 (28.6%)    |             |
| Both eyes off-chart                                          | 25 (25.5%)    |             |
| <b>Intraocular Pressure (IOP)</b>                            | 14.92 (2.9)   | 6; 22       |
| <b>Contrast sensitivity (LogCS)</b>                          |               |             |
| LogCS of all eyes                                            | 0.37 (0.46)   | 0; 1.35     |
| LogCS of first affected eye                                  | 0.31          | 0; 1.35     |
| LogCS of second/not-yet-affected affected eye                | 0.44          | 0; 1.35     |
| <b>Humphrey Visual Field</b>                                 |               |             |
| HVF mean deviation (MD) (dB)                                 |               |             |
| HVF MD of all eyes (dB)                                      | -22.31 (10.3) | -34.6; -0.3 |
| HVF MD of first affected eye (dB)                            | -23.25        | -34.6; -0.3 |
| HVF MD of second affected eye (dB)                           | -21.37        | -34.5; -1.6 |
| HVF pattern standard deviation (PSD) (dB)                    |               |             |
| HVF PSD of all eyes (dB)                                     | 7.02 (3.5)    | 1.4; 14.0   |
| HVF PSD of first affected eye (dB)                           | 6.91          | 1.5; 14.0   |
| HVF PSD of second affected eye (dB)                          | 7.13          | 1.4; 13.6   |
| HVF foveal threshold (FT) (dB) <sup>4</sup>                  |               |             |
| HVF FT of all eyes (dB)                                      | 6.05 (10.1)   | 0; 43.0     |
| HVF FT of first affected eye (dB)                            | 5.86          | 0; 36.0     |
| HVF FT of second affected eye (dB)                           | 6.24          | 0; 43.0     |
| <b>STRUCTURAL PARAMETERS (SD-OCT)<sup>5</sup></b>            |               |             |
| GCL macular volume (mm <sup>3</sup> )                        |               |             |
| GCL macular volume of all eyes (mm <sup>3</sup> )            | 0.60 (0.1)    | 0.35; 1.00  |
| GCL macular volume of first affected eye (mm <sup>3</sup> )  | 0.58          | 0.38; 0.93  |
| GCL macular volume of second affected eye (mm <sup>3</sup> ) | 0.63          | 0.35; 1.00  |
| Papillo-Macular Bundle (PMB) RNFL thickness (µm)             |               |             |
| PMB RNFL thickness of all eyes (µm) <sup>6</sup>             | 29.5 (13.4)   | 10.0; 126.0 |
| PMB RNFL thickness of first affected eyes (µm)               | 28.17         | 10.0; 126.0 |

|                                                                            |               |             |
|----------------------------------------------------------------------------|---------------|-------------|
| PMB RNFL thickness of second affected eyes ( $\mu\text{m}$ )               | 30.77         | 10.0; 101.0 |
| Temporal Quadrant RNFL thickness ( $\mu\text{m}$ ) <sup>5</sup>            |               |             |
| Temporal Quadrant RNFL thickness of all eyes ( $\mu\text{m}$ )             | 38.38 (23.0)  | 19.0; 183.0 |
| Temporal Quadrant RNFL thickness of first affected eyes ( $\mu\text{m}$ )  | 34.99         | 19.0; 183.0 |
| Temporal Quadrant RNFL thickness of second affected eyes ( $\mu\text{m}$ ) | 41.69         | 19.0; 162.0 |
| Average RNFL thickness ( $\mu\text{m}$ ) <sup>6</sup>                      |               |             |
| Average RNFL thickness of all eyes ( $\mu\text{m}$ )                       | 80.85 (28.97) | 37; 200     |
| Average RNFL thickness of first affected eyes ( $\mu\text{m}$ )            | 76.09         | 38; 197     |
| Average RNFL thickness of second affected eyes ( $\mu\text{m}$ )           | 75.50         | 37; 200     |
| ETDRS macular volume ( $\text{mm}^3$ )                                     |               |             |
| ETDRS macular volume of all eyes ( $\text{mm}^3$ )                         | 7.91 (0.5)    | 6.8; 9.5    |
| ETDRS macular volume of first affected eyes ( $\text{mm}^3$ )              | 7.91          | 6.8; 9.5    |
| ETDRS macular volume of second affected eyes ( $\text{mm}^3$ )             | 8.03          | 6.2; 9.5    |

Data presented are mean (SD) and range or counts (%) where appropriate.

<sup>1</sup> Medical history occurring in more than 10% of subjects

<sup>2</sup> One subject was unilaterally affected (only one eye with drop of vision) at baseline

<sup>3</sup> Use of idebenone within 30 days prior to intravitreal injection of the study treatment and discontinued prior to study treatment. Idebenone had to be discontinued at least 7 days prior to inclusion and was prohibited during the study.

<sup>4</sup> 186 eyes (missing data for 5 eyes)

<sup>5</sup> Average of screening and baseline values

<sup>6</sup> 194 eyes (missing data for 2 eyes)

Better-seeing eye: The better-seeing and worse-seeing eye of each subject were determined based on the baseline vision testing performed at inclusion. A pre-defined algorithm for determining the better- and worse-seeing eyes was utilized as follows: 1) LogMAR BCVA (Criterion 1): The eye with the better (i.e., lower) LogMAR BCVA was the better-seeing eye. If both eyes had an equal LogMAR acuity, the second criterion was utilized; 2) SD-OCT parameters (Criterion 2; used if there was no inter-eye difference based on Criterion 1); 3) Log of Contrast Sensitivity (LogCS) (Criterion 3; used if there was no inter-eye difference in criteria 1 or 2). The eye with the better LogCS score was the better-seeing eye; 4) If the better-seeing eye could not be determined based on criteria 1 through 3, the selection of the better-seeing eye was based on the subject's opinion.

BCVA, Best Corrected Visual Acuity; ETDRS, Early Treatment Diabetic Retinopathy Study; GCL, Ganglion Cell Layer; HVF, Humphrey Visual Field; LogCS, Logarithm of Contrast Sensitivity; LogMAR, Logarithm of the Minimal Angle of Resolution; n, number of subjects; RNFL, Retinal Nerve Fiber Layer; SD, Standard Deviation; SD-OCT, Spectral-Domain Optical Coherence Tomography.

**Supplemental Table 3. Individual data of a female patient aged between 35 and 40 years with no vision loss in one eye at baseline. The duration of vision loss in the affected eye (left) was 70 days.**

|                            |                                               | Period    | Affected eye  | Unaffected eye |
|----------------------------|-----------------------------------------------|-----------|---------------|----------------|
| BCVA (LogMAR)<br>(Snellen) |                                               | Screening | 0.7<br>20/100 | 0<br>20/20     |
|                            |                                               | Baseline  | 0.7<br>20/100 | 0<br>20/20     |
| CS (LogCS)                 |                                               | Screening | 1.20          | 1.65           |
|                            |                                               | Baseline  | 1.05          | 1.35           |
| HVF (dB)                   | MD                                            | Screening | -2.64         | -4.05          |
|                            |                                               | Baseline  | -3.28         | -2.82          |
|                            | PSD                                           | Screening | 1.86          | 2.44           |
|                            |                                               | Baseline  | 4.17          | 1.59           |
| SD-OCT                     | GCL Macular Volume (mm <sup>3</sup> )         | Screening | 0.84          | 0.96           |
|                            |                                               | Baseline  | 0.86          | 0.96           |
|                            | PMB RNFL Thickness (μm)                       | Screening | 53            | 63             |
|                            |                                               | Baseline  | 88            | 68             |
|                            | RNFL Quadrant Temporal (μm)                   | Screening | 82            | 87             |
|                            |                                               | Baseline  | 111           | 90             |
|                            | RNFL Average Thickness (μm)                   | Screening | 120           | 112            |
|                            |                                               | Baseline  | 129           | 114            |
|                            | ETDRS Total Macular Volume (mm <sup>3</sup> ) | Screening | 9.49          | 9.24           |
|                            |                                               | Baseline  | 9.47          | 9.22           |

BCVA, best-corrected visual acuity; CS, contrast sensitivity; ETDRS, Early-Treatment Diabetic Retinopathy Study; GCL, ganglion cell layer; HVF, Humphrey visual field; logMAR, logarithm of the minimal angle of deviation; MD, mean deviation; PMB, papillomacular bundle; PSD, pattern standard deviation; RNFL, retinal nerve fiber layer; SD-OCT, spectral-domain optical coherence tomography.

**Supplemental Table 4. Logarithm of the Minimal Angle of Resolution (LogMAR) and Humphrey visual field (HVF) Mean Deviation (MD) according to tobacco consumption.**

|         | LogMAR |       |        |       |
|---------|--------|-------|--------|-------|
| Tobacco | Mean   | SD    | Min    | Max   |
| Current | 1.59   | 0.41  | 0.40   | 2.00  |
| Former  | 1.43   | 0.49  | 0      | 2.30  |
| Never   | 1.61   | 0.48  | 0.60   | 2.30  |
|         | HVF MD |       |        |       |
| Tobacco | Mean   | SD    | Min    | Max   |
| Current | -23.26 | 9.08  | -33.96 | -2.22 |
| Former  | -18.71 | 10.27 | -33.40 | -2.06 |
| Never   | -23.97 | 10.39 | -34.55 | -0.31 |

SD, standard deviation

**Supplemental Table 5. Logarithm of the Minimal Angle of Resolution (LogMAR) and Humphrey visual field (HVF) Mean Deviation (MD) according to alcohol consumption.**

|                | <b>LogMAR</b> |           |            |            |
|----------------|---------------|-----------|------------|------------|
| <b>Alcohol</b> | <b>Mean</b>   | <b>SD</b> | <b>Min</b> | <b>Max</b> |
| <b>Current</b> | 1.51          | 0.45      | 0          | 2.30       |
| <b>Former</b>  | 1.54          | 0.48      | 0.40       | 2.30       |
| <b>Never</b>   | 1.63          | 0.50      | 0.60       | 2.30       |
|                | <b>HVF MD</b> |           |            |            |
| <b>Alcohol</b> | <b>Mean</b>   | <b>SD</b> | <b>Min</b> | <b>Max</b> |
| <b>Current</b> | -21.24        | 10.03     | -34.15     | -2.06      |
| <b>Former</b>  | -20.87        | 10.90     | -34.55     | -0.31      |
| <b>Never</b>   | -25.14        | 9.89      | -34.48     | -1.65      |

SD, standard deviation



**Supplemental Table 6. Individual data of all 5 patients in RESCUE and REFLECT studies with one eye with no vision loss at baseline**

|                                                       |                                                    | RESCUE           |               |               |               | REFLECT    |       |
|-------------------------------------------------------|----------------------------------------------------|------------------|---------------|---------------|---------------|------------|-------|
|                                                       |                                                    | Subject #12      | Subject #15   | Subject #22   | Subject #26   | Subject    |       |
| <b>Age range (years)</b>                              |                                                    | 20-25            | 20-25         | 25-30         | 30-35         | 35-40      |       |
| <b>Gender</b>                                         |                                                    | F                | M             | F             | M             | F          |       |
| <b>Duration of vision loss in affected eye (days)</b> |                                                    | 155              | 90            | 57            | 49            | 70         |       |
| <b>Unaffected eye</b>                                 |                                                    | Left             | Right         | Left          | Right         | Right      |       |
| <b>BCVA (LogMAR) (Snellen)</b>                        | <i>Screening</i>                                   | -0.2<br>20/13    | -0.3<br>20/10 | 0.0<br>20/20  | -0.1<br>20/16 | 0<br>20/20 |       |
|                                                       | <i>Inclusion</i>                                   | -0.2<br>20/13    | -0.2<br>20/13 | -0.1<br>20/16 | -0.1<br>20/16 | 0<br>20/20 |       |
| <b>CS (LogCS)</b>                                     | <i>Screening</i>                                   | 1.65             | 1.65          | 1.65          | 1.65          | 1.65       |       |
|                                                       | <i>Inclusion</i>                                   | 1.35             | 1.65          | 1.5           | 1.65          | 1.35       |       |
| <b>HVF (dB)</b>                                       | <b>MD</b>                                          | <i>Screening</i> | NR            | NR            | NR            | -1.14      | -4.05 |
|                                                       |                                                    | <i>Inclusion</i> | NR            | -2.4          | -1.9          | NR         | -2.82 |
|                                                       | <b>PSD</b>                                         | <i>Screening</i> | NR            | NR            | NR            | 1.87       | 2.44  |
|                                                       |                                                    | <i>Inclusion</i> | NR            | 1.6           | 1.29          | NR         | 1.59  |
| <b>SD-OCT</b>                                         | <b>GCL Macular Volume (mm<sup>3</sup>)</b>         | <i>Screening</i> | 1.06          | 1.28          | 1.06          | 1.27       | 0.96  |
|                                                       |                                                    | <i>Inclusion</i> | 1.07          | 1.27          | 1.01          | 1.24       | 0.96  |
|                                                       | <b>ETDRS Total Macular Volume (mm<sup>3</sup>)</b> | <i>Screening</i> | 8.44          | 9.53          | 8.72          | 9.34       | 9.24  |
|                                                       |                                                    | <i>Inclusion</i> | 8.48          | 9.63          | 8.69          | 9.31       | 9.22  |
|                                                       | <b>PMB RNFL Thickness (µm)</b>                     | <i>Screening</i> | 62            | 118           | 66            | 65         | 63    |
|                                                       |                                                    | <i>Inclusion</i> | 64            | 128           | 69            | 69         | 68    |
|                                                       | <b>RNFL Quadrant Temporal (µm)</b>                 | <i>Screening</i> | 88            | 141           | 81            | 80         | 87    |
|                                                       |                                                    | <i>Inclusion</i> | 88            | 154           | 85            | 85         | 90    |
|                                                       | <b>RNFL Average Thickness (µm)</b>                 | <i>Screening</i> | 107           | 143           | 95            | 118        | 112   |
|                                                       |                                                    | <i>Inclusion</i> | 108           | 149           | 97            | 121        | 114   |

BCVA, best-corrected visual acuity; CS, contrast sensitivity; ETDRS, Early-Treatment Diabetic Retinopathy Study; GCL, ganglion cell layer; HVF, Humphrey visual field; logMAR, logarithm of the minimal angle of deviation; MD, mean deviation; NR, not reliable; PMB, papillomacular bundle; PSD, pattern standard deviation; RNFL, retinal nerve fiber layer; SD-OCT, spectral-domain optical coherence tomography.

Supplemental Figure 1. REFLECT study design.

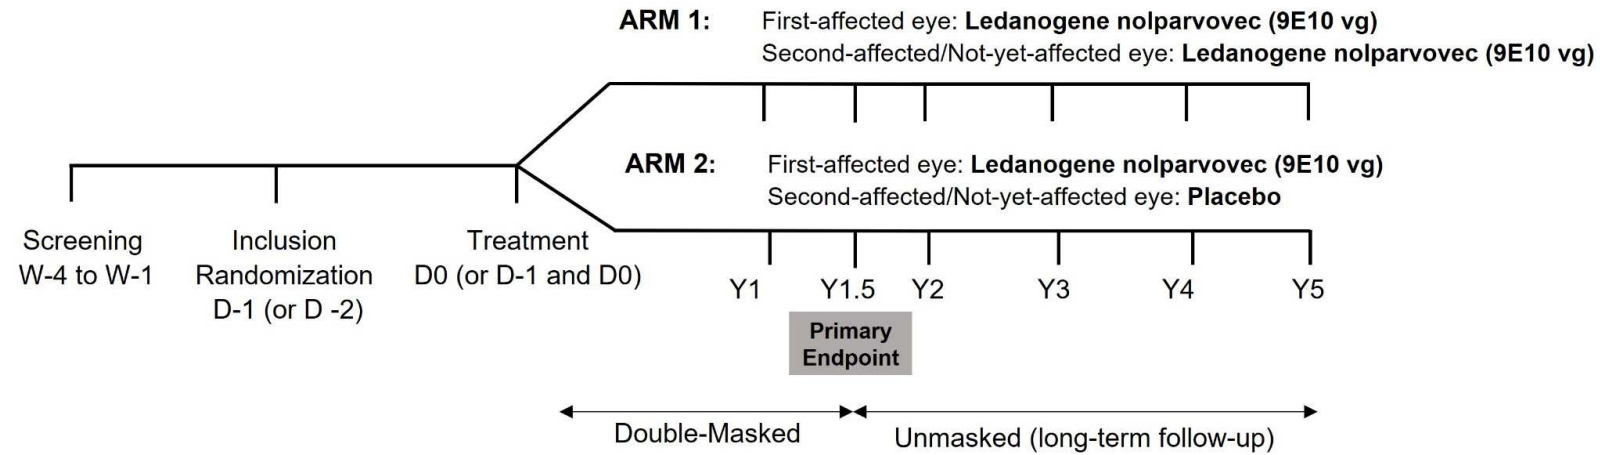

Study treatment was administered on the same day (Day 0) with two separate procedures or on two consecutive days (Day -1 and Day 0) at the investigator's discretion. In all cases, the first intravitreal injection had to be performed the day following inclusion. Subjects were allocated 1:1 to the two arms. If vision loss was simultaneous, one eye was randomly designated as first-affected. D, day; vg, vector genomes; W, week; Y, year
